# Supplementary figures and images for: Cryscor: a program for the post-Hartree–Fock treatment of periodic systems
Source: Royal Society of Chemistry journal article supplement (doi:10.1039/c2cp23927b), 2012-01-01

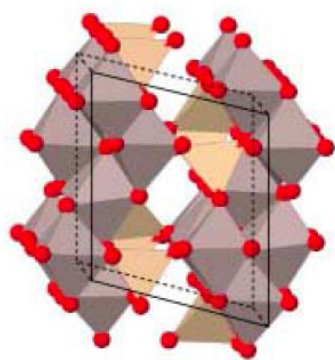

Fig. S1

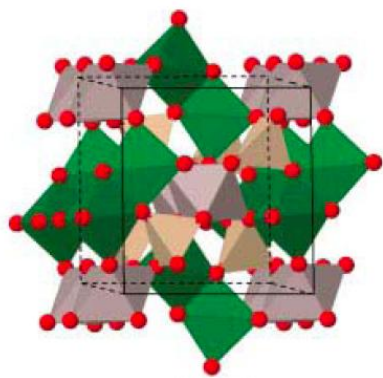

Fig. S2

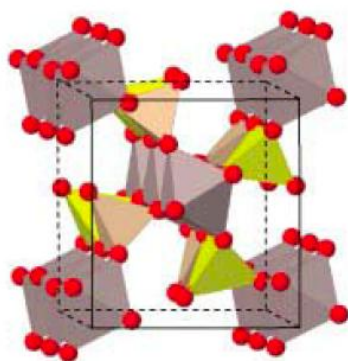

Fig. S3

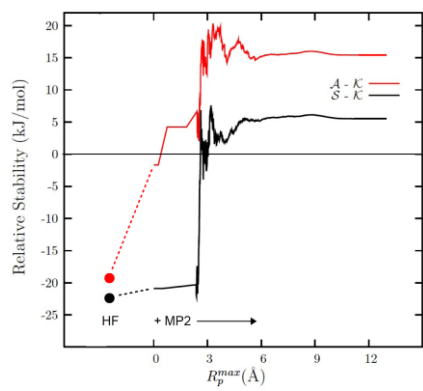

Fig. S4

Supplement: c2cp23927b_2.pdf [file c2cp23927b_2.pdf]
